# Supplementary material for: Membrane progesterone receptor induces meiosis in Xenopus oocytes through endocytosis into signaling endosomes and interaction with APPL1 and Akt2
Source: PubMed Central journal article supplement (PMC7660923; doi:10.1371/journal.pbio.3000901), 2020-11-02

### Full Western Blot: Fig 1G

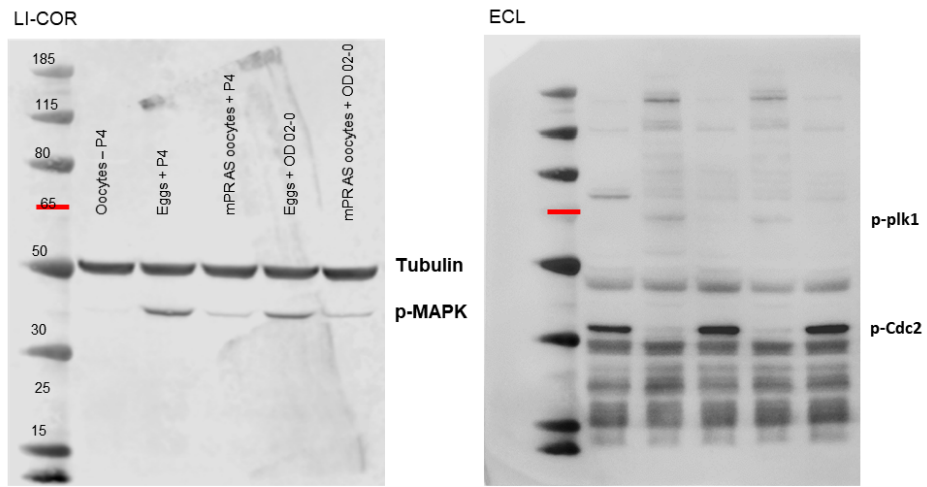

### Full Western Blot: Fig 2A

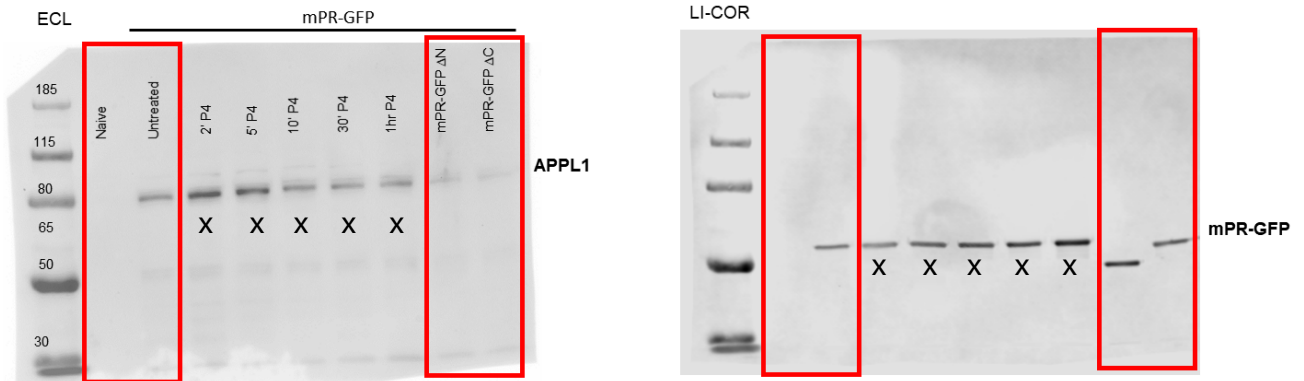

### Full Western Blot: Fig 2C

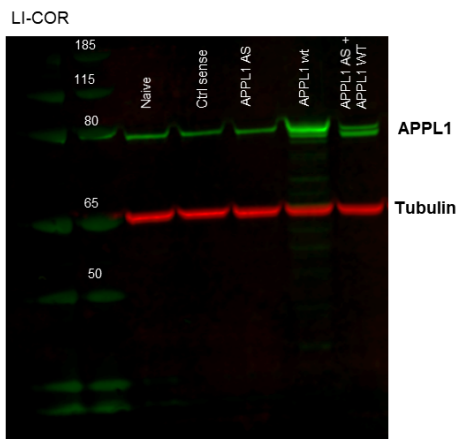

### Full Western Blot: Fig 2G

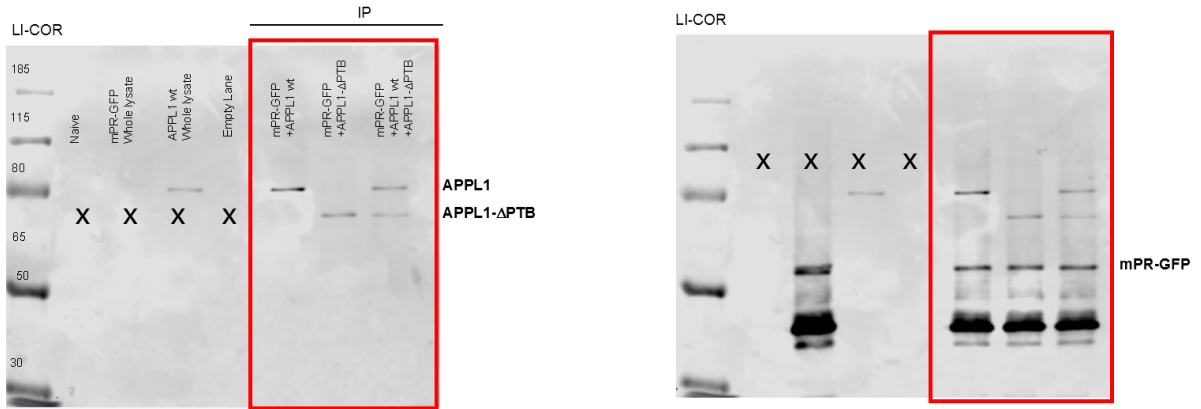

### Full Western Blot: Fig 2I

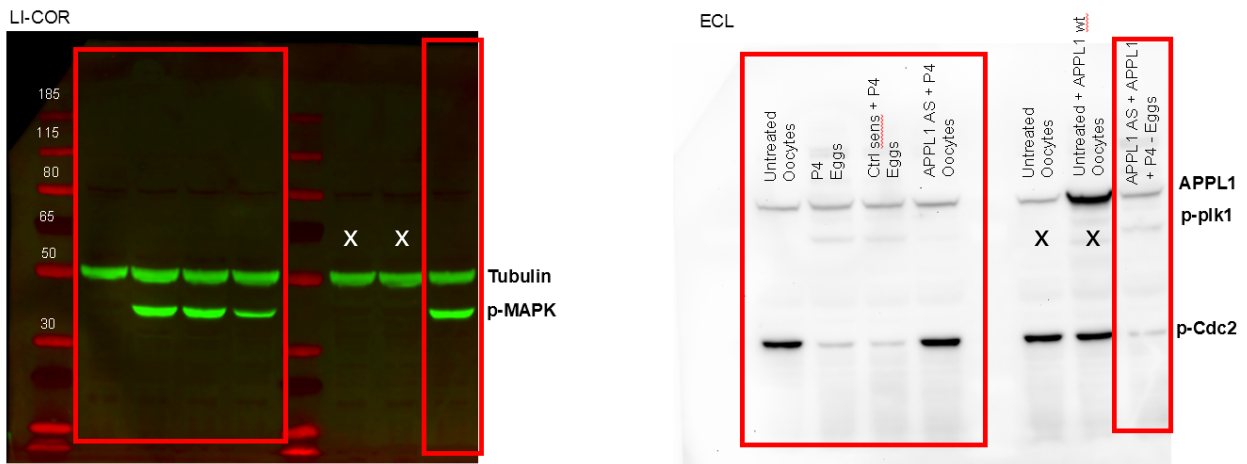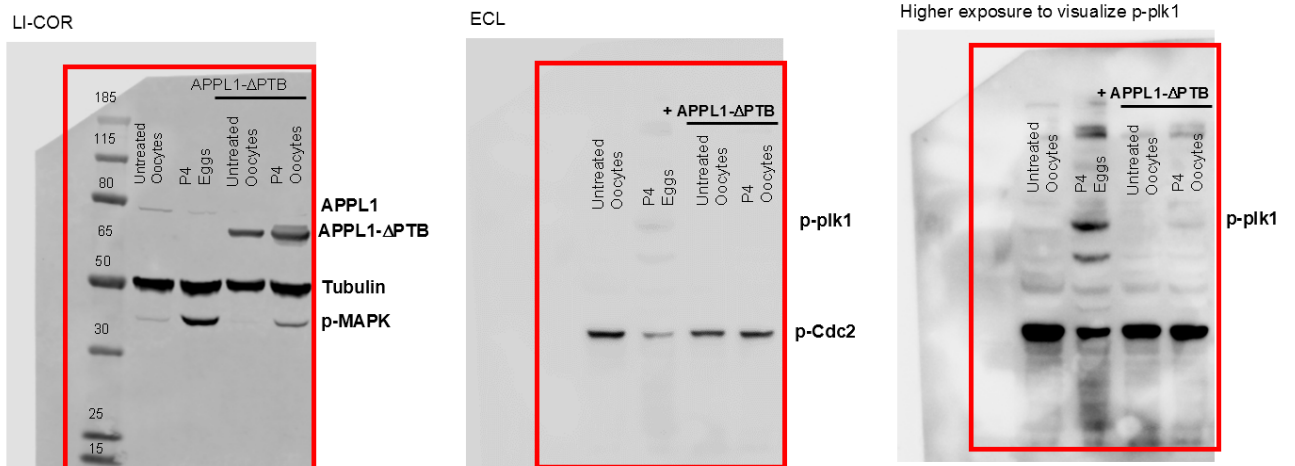

Full Western Blot: Fig 2M

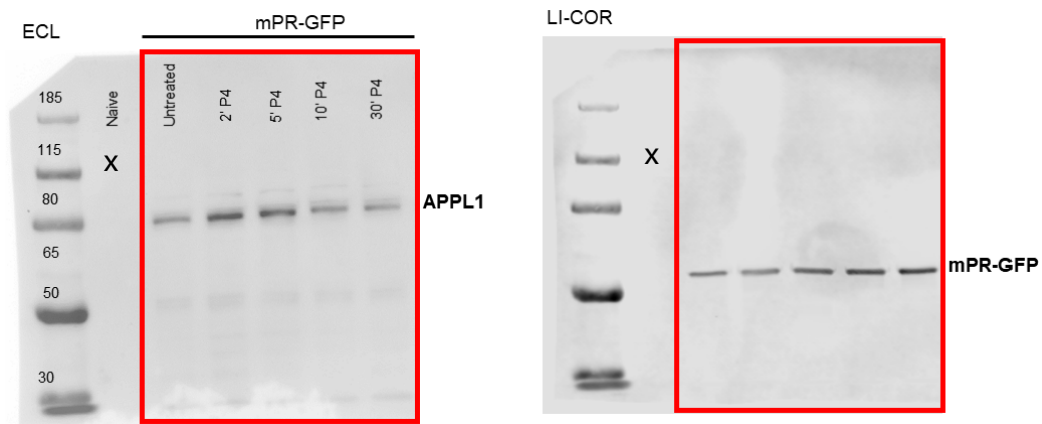

Full Western Blot: Fig 3B

MAPK and Tubulin – LiCOR

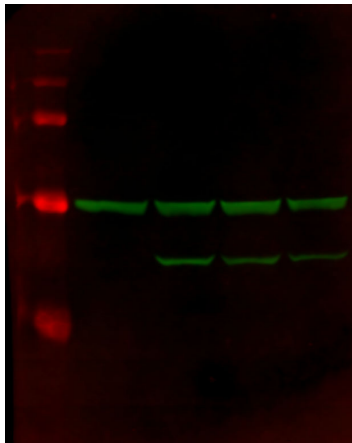

p-cdc2 and p-plk1 – Rabbit ECL

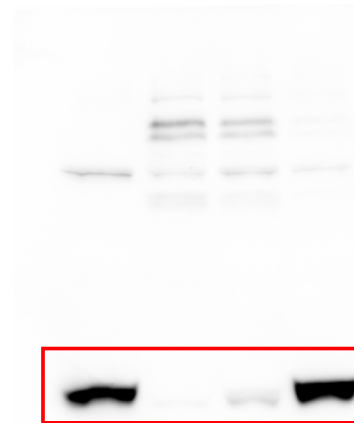

Higher exposure for p-plk1

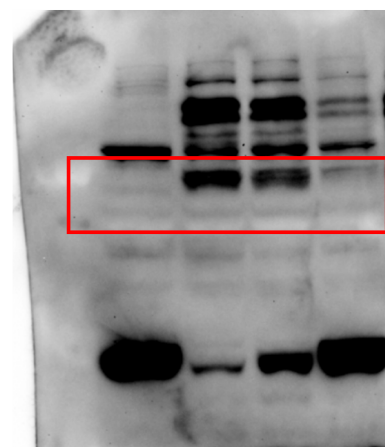

Full Western Blot: Fig 3D

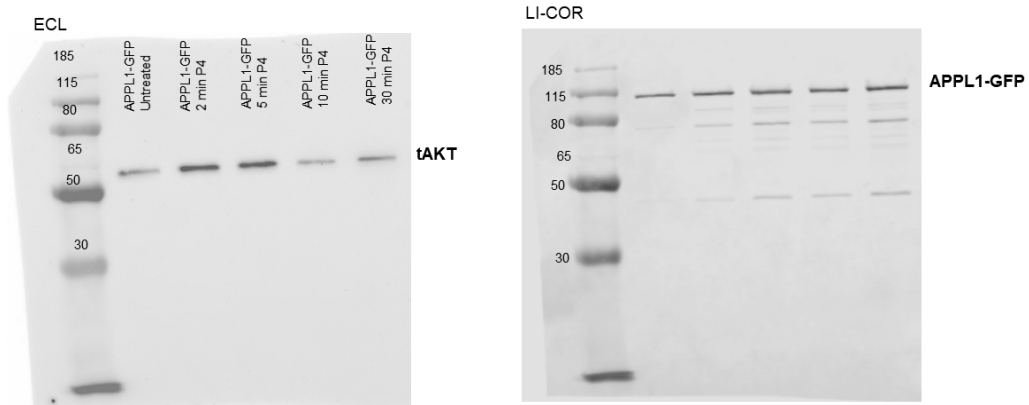

Full Western Blot: Fig 3F

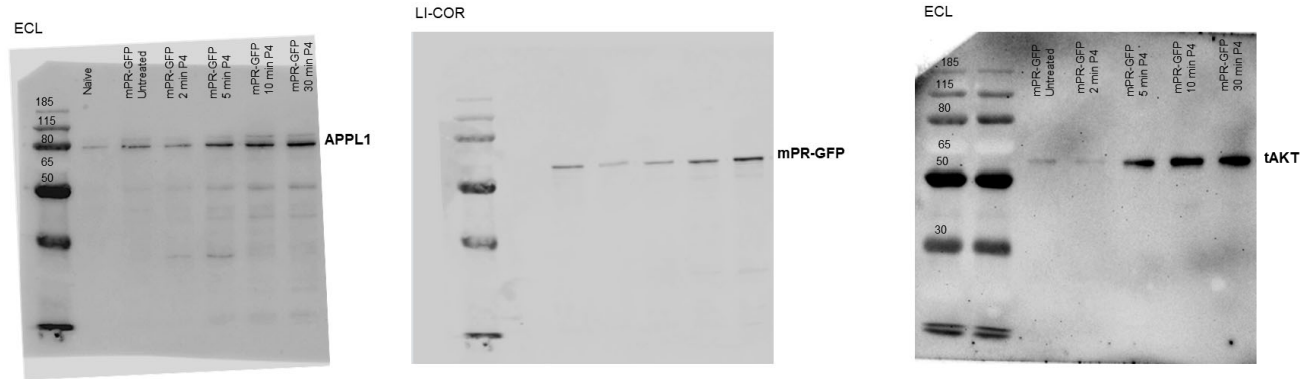

Full Western Blot: Fig 3I

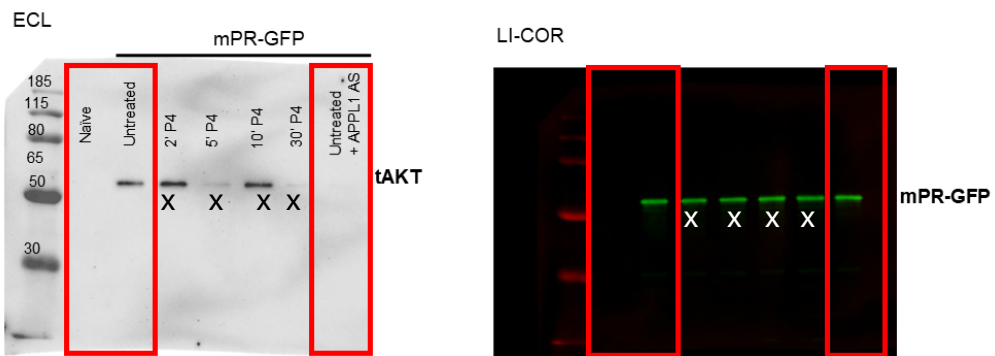

Full Western Blot: Fig 3J

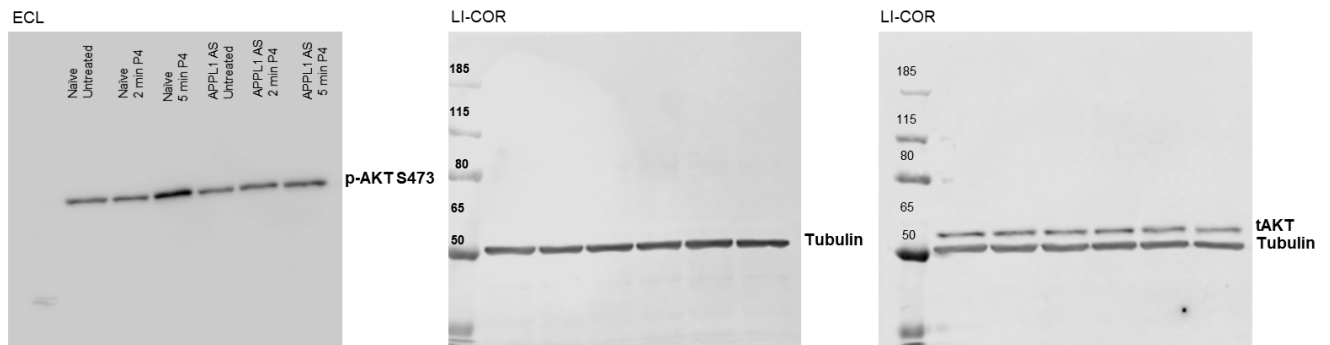



### Full Western Blot: S3D Fig

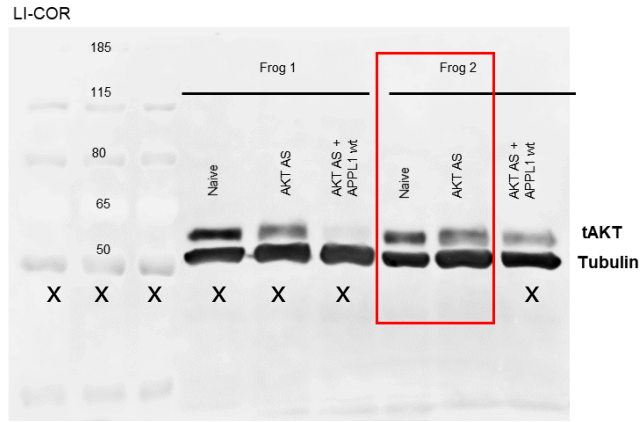

### Full Western Blot: S3E Fig

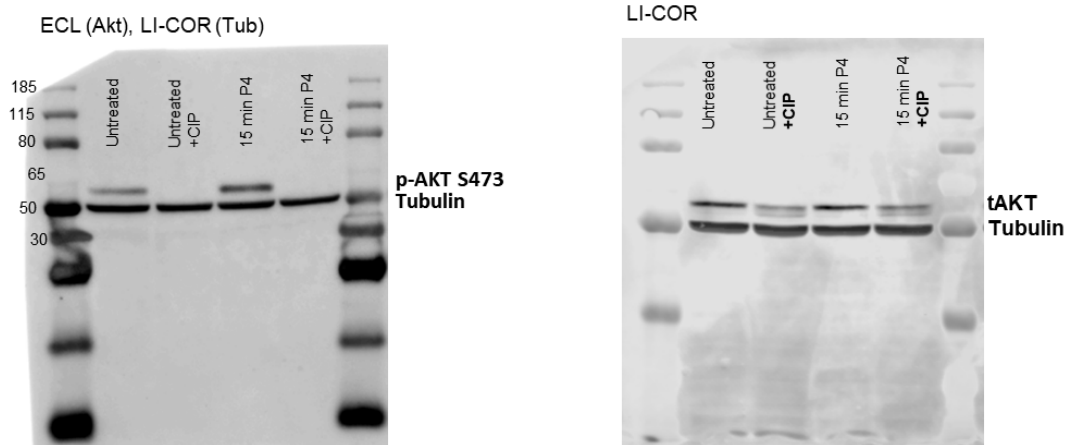

### Full Western Blot: S5A Fig

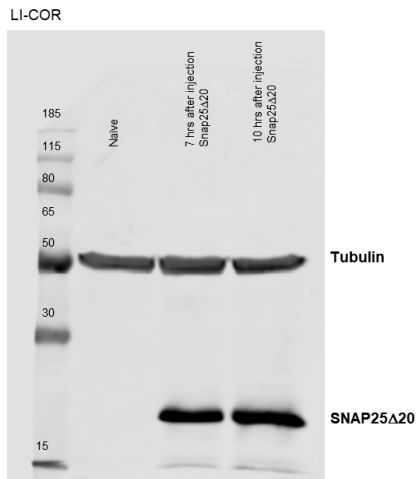

Supplement: pbio.3000901.s011.pdf [file pbio.3000901.s011.pdf]
